# Supplementary material for: d-PET coupled ESIPT phenomenon for fluorescent turn-on detection of hydrogen sulfide
Source: Royal Society of Chemistry journal article supplement (doi:10.1039/c3ra42499e), 2013-01-01
Supplement: c3ra42499e.pdf [file c3ra42499e.pdf]

## Electronic Supplementary Information

### **d-PET coupled ESIPT phenomenon for fluorescent turn-on detection of hydrogen sulfide**

Shahi Imam Reja, Naresh Kumar, Roopali Sachdeva, Vandana Bhalla and  
Manoj Kumar,\*

*Department of Chemistry, UGC Sponsored Centre for Advanced Studies-1, Guru Nanak  
Dev University, Amritsar, Punjab, India.*

*Fax: +91 (0)183 2258820; Tel: +91 (0)183 2258802 9x3205;*

**E-mail: [mksharmaa@yahoo.co.in](mailto:mksharmaa@yahoo.co.in)**

- S3 Instruments and Quantum yield calculation
- S4 Synthetic routes
- S5 <sup>1</sup>H NMR spectrum of compound **2** (15-0 ppm)
- S6 <sup>13</sup>C NMR spectrum of compound **2**
- S7 <sup>1</sup>H NMR spectrum of compound **2** (expanded)
- S8 Mass spectrum of compound **2**
- S9 UV-vis spectra of compound **2** in the presence of H<sub>2</sub>S and different analyte in  
H<sub>2</sub>O/CH<sub>3</sub>CN (99.5:0.5, v/v) buffered with HEPES; pH = 7.4.
- S10 Mass spectrum of product **3**
- S11 The blue shift of fluorescence emission band.
- S12 Temperature dependent fluorescence studies
- S13 Competitive fluorescence selectivity of compound **2**

S14     Calculations for detection limit and detection limit of H<sub>2</sub>S

S15     Procedure for test-strips studies

## Instruments and quantum yield calculation

All reagents were purchased from Aldrich and were used without further purification. Acetonitrile (AR grade) was used to perform analytical studies. UV-vis spectra were recorded on a SHIMADZU UV-2450 spectrophotometer, with a quartz cuvette (path length 1 cm). The cell holder was thermostatted at 25<sup>0</sup>C. The fluorescence spectra were recorded with a SHIMADZU 5301 PC spectrofluorimeter. Elemental analysis was done using a Flash EA 1112 CHNS/O analyzer from Thermo Electron Corporation. <sup>1</sup>H spectra were recorded on a JEOL-FT NMR-AL 300 MHz spectrophotometer using CDCl<sub>3</sub> as solvent and tetramethylsilane as the internal standard. Data are reported as follows: chemical shift in ppm (*d*), multiplicity (s = singlet, d = doublet, t = triplet, m = multiplet, br = broad singlet), coupling constants *J* (Hz), integration and interpretation. Fluorescence quantum yields<sup>1</sup> were determined by using optically matching solution of diphenyl anthracene ( $\Phi_{fr} = 0.9$  in cyclohexane) as standard at an excitation wavelength of 373 nm and quantum yield is calculated using the equation:

$$\Phi_{is} = \Phi_{fr} \times \frac{1-10^{-A_r L_r}}{1-10^{-A_s L_s}} \times \frac{N_s^2}{N_r^2} \times \frac{D_s}{D_r}$$

$\Phi_{is}$  and  $\Phi_{fr}$  are the radiative quantum yields of sample and the reference respectively,  $A_s$  and  $A_r$  are the absorbance of the sample and the reference respectively,  $D_s$  and  $D_r$  the respective areas of emission for sample and reference.  $L_s$  and  $L_r$  are the lengths of the absorption cells of sample and reference respectively.  $N_s$  and  $N_r$  are the refractive indices of the sample and reference solutions (pure solvents were assumed respectively).

---

<sup>1</sup> Deams, J. N.; Grosby, G. A. *J. Phys. Chem.* **1971**, 75, 991.

## Synthesis

Compounds **1**<sup>2</sup> and **2**<sup>3</sup> were synthesized according to previously reported procedures.

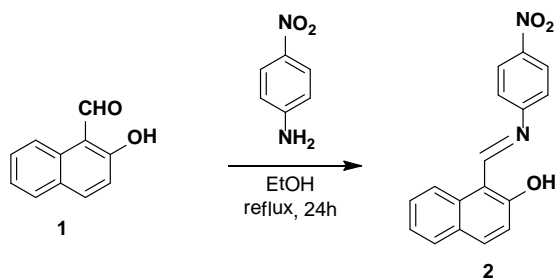

**Scheme 1** Synthesis of compound **2**.

<sup>2</sup> Mehta, B. H.; Shaikh, J. A. *J. Indian Chem. Soc.*, **2009**, 86, 624.

<sup>3</sup> Antonov, L.; Fabian, W. M. F.; Nedeltcheva, D.; Kamounah, F. S. *J. Chem. Soc., Perkin Trans. 2*, **2000**, 1173.

# <sup>1</sup>H NMR spectra of compound 2

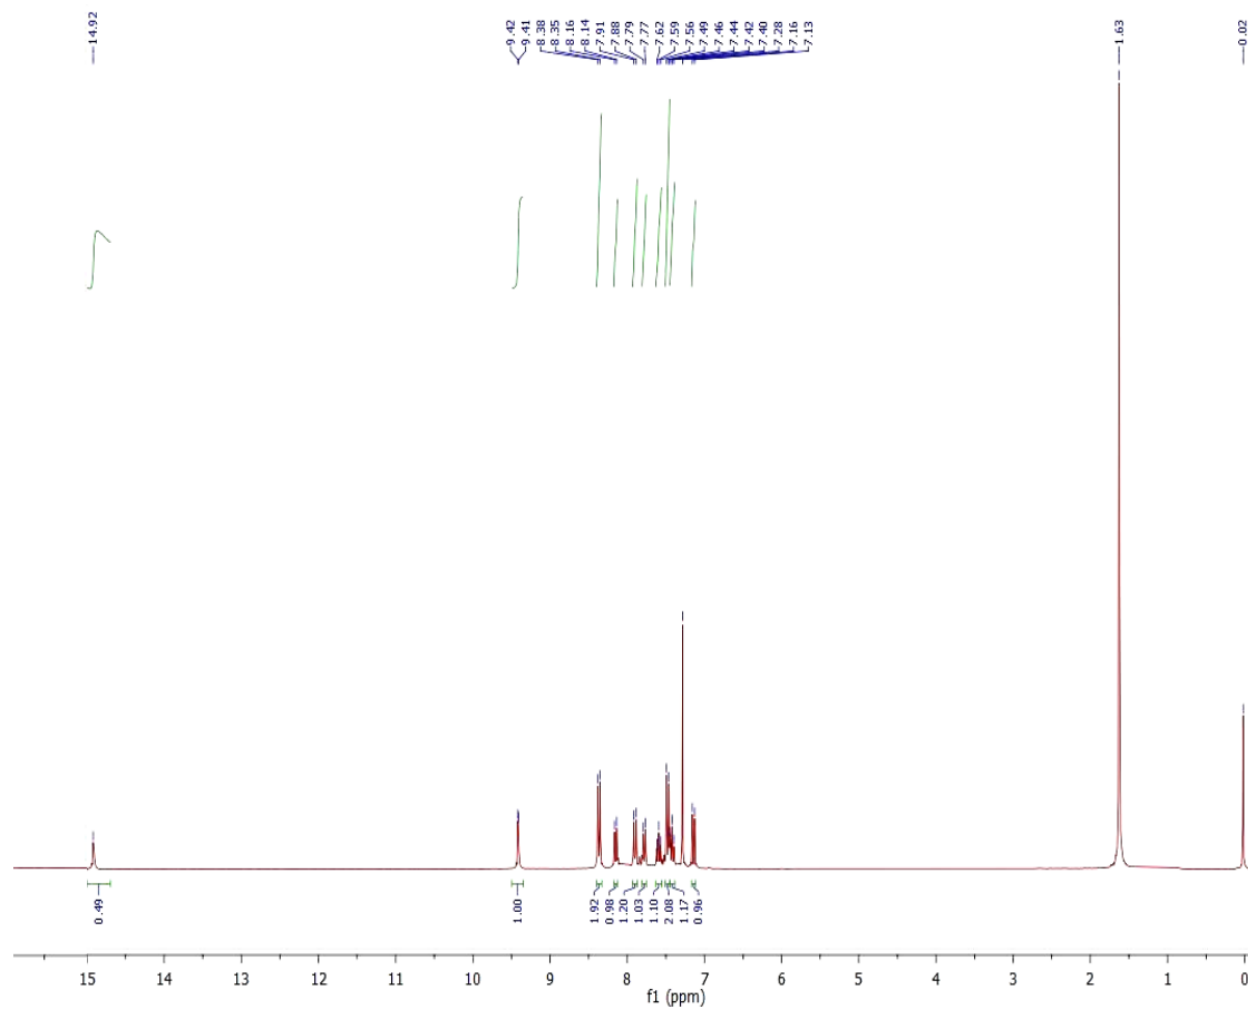

### $^{13}\text{C}$ NMR of compound 2

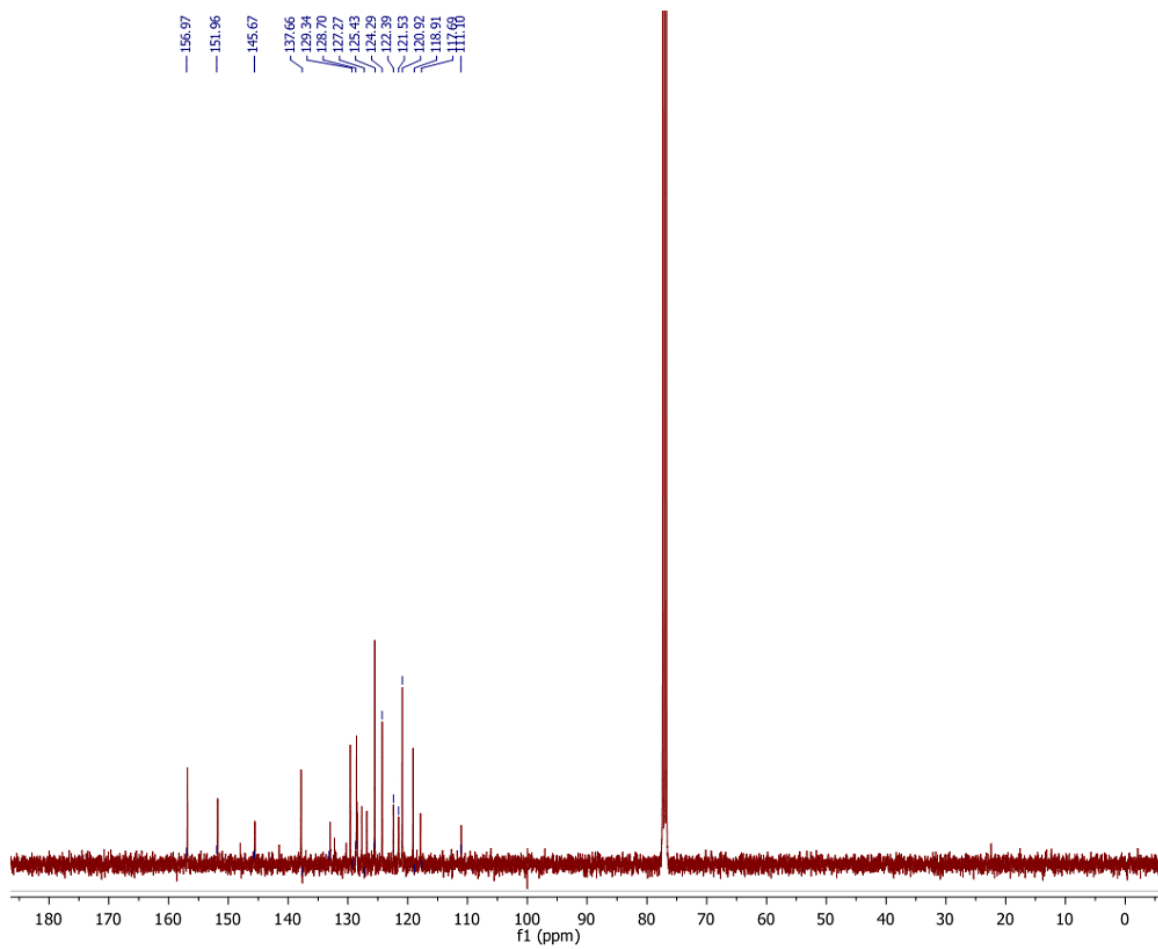

<sup>1</sup>H NMR spectra of compound 2 (expanded)

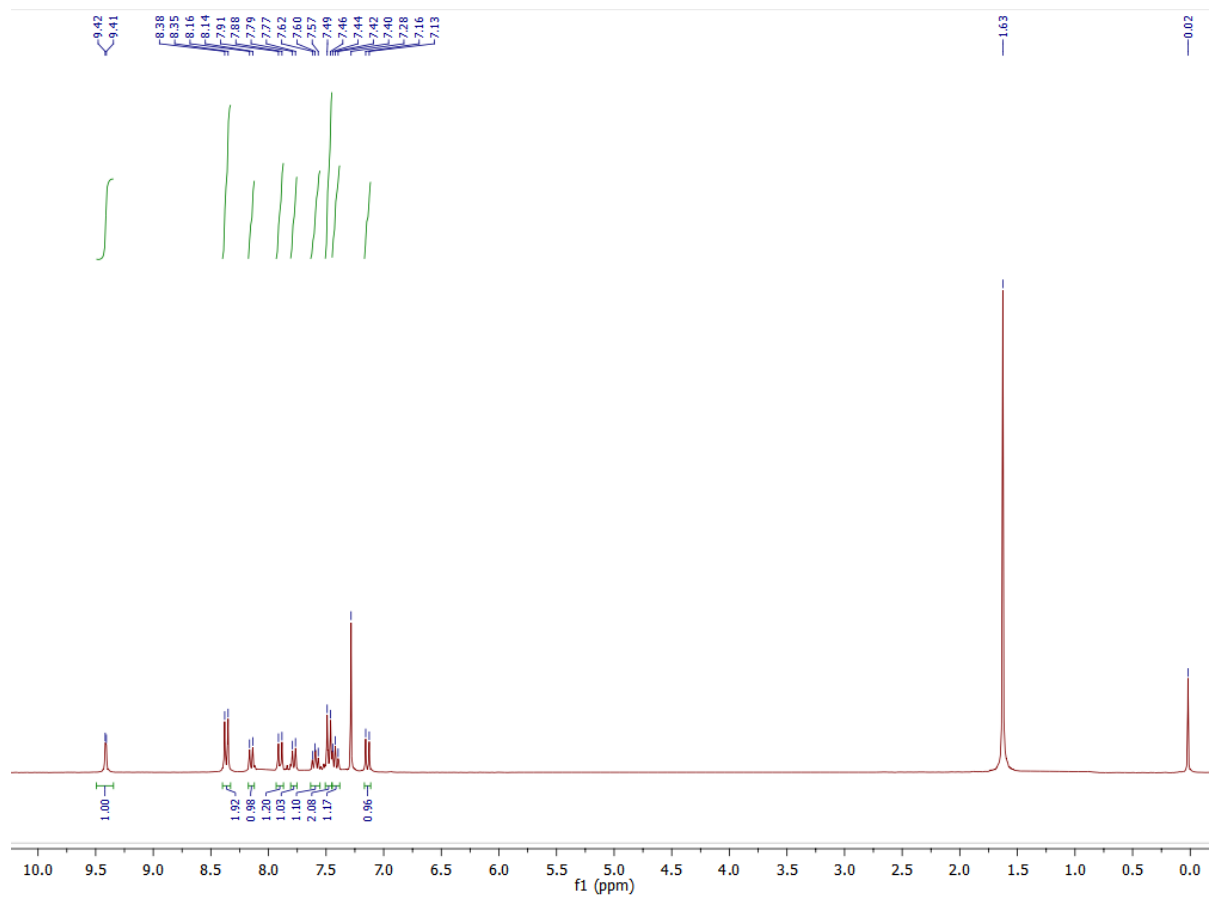

## Mass spectrum of compound 2

### Acquisition Parameter

|             |            |                       |           |                  |           |
|-------------|------------|-----------------------|-----------|------------------|-----------|
| Source Type | ESI        | Ion Polarity          | Positive  | Set Nebulizer    | 0.4 Bar   |
| Focus       | Not active | Set Capillary         | 4500 V    | Set Dry Heater   | 180 °C    |
| Scan Begin  | 50 m/z     | Set End Plate Offset  | -500 V    | Set Dry Gas      | 4.0 l/min |
| Scan End    | 3000 m/z   | Set Collision Cell RF | 150.0 Vpp | Set Divert Valve | Waste     |

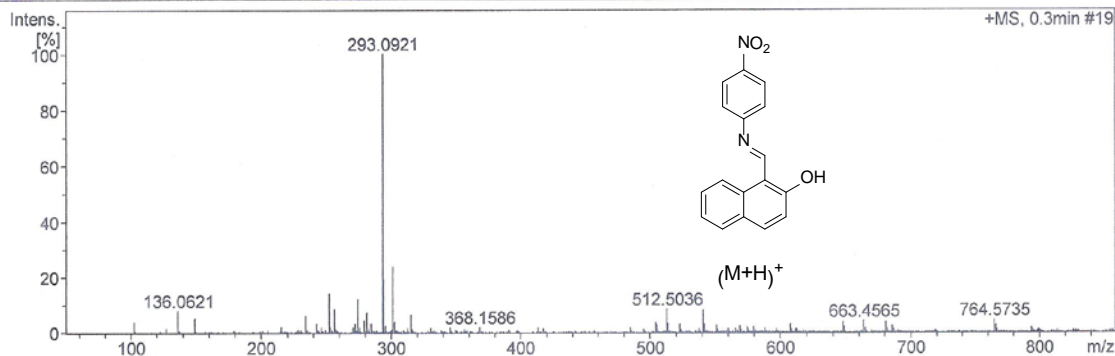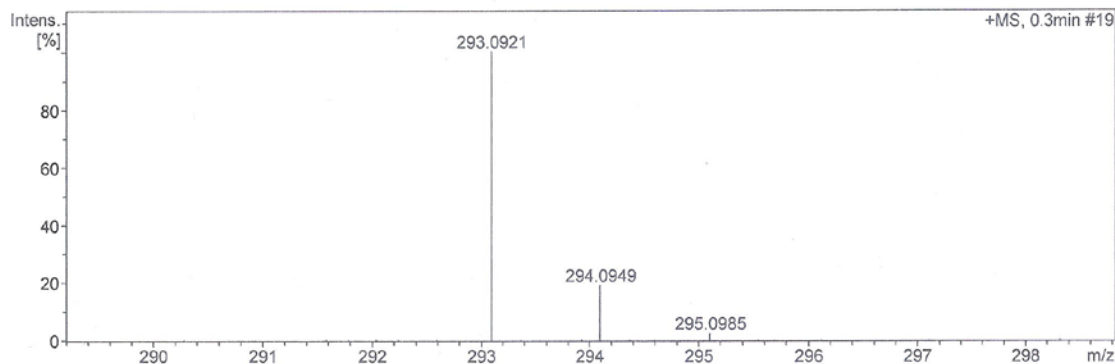

**UV-vis spectra of compound 2 in the presence of H<sub>2</sub>S and different analyte in H<sub>2</sub>O/CH<sub>3</sub>CN (99.5:0.5, v/v) buffered with HEPES; pH = 7.4.**

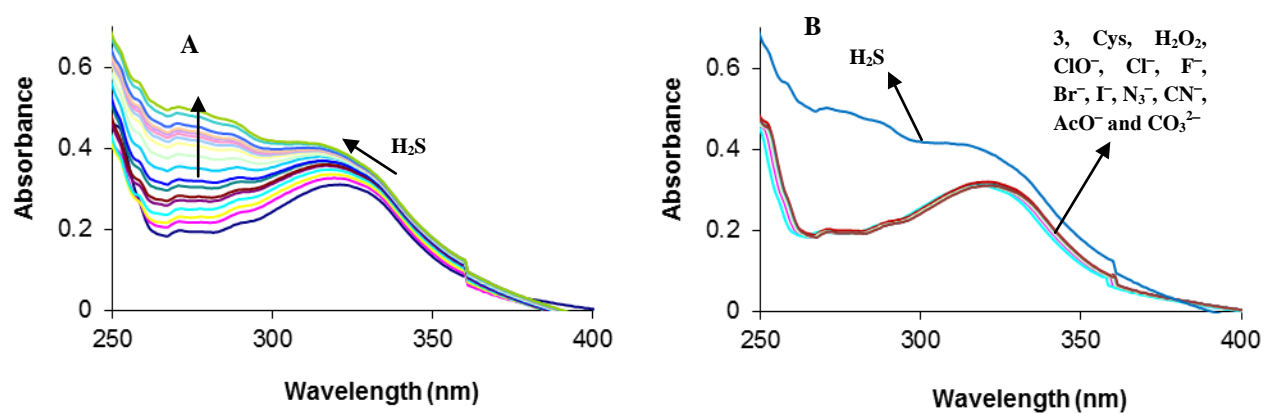

**Figure S9.** UV/vis spectra of receptor **3** (5 μM) in the presence of (A) H<sub>2</sub>S (25 μM); (B) other analytes (25 μM each) in H<sub>2</sub>O:CH<sub>3</sub>CN (99.5:0.5, v/v) buffered with HEPES, pH = 7.4.

## Mass spectrum of product 3

### Acquisition Parameter

|             |            |                       |           |                  |           |
|-------------|------------|-----------------------|-----------|------------------|-----------|
| Source Type | ESI        | Ion Polarity          | Positive  | Set Nebulizer    | 0.4 Bar   |
| Focus       | Not active | Set Capillary         | 4500 V    | Set Dry Heater   | 180 °C    |
| Scan Begin  | 50 m/z     | Set End Plate Offset  | -500 V    | Set Dry Gas      | 4.0 l/min |
| Scan End    | 3000 m/z   | Set Collision Cell RF | 150.0 Vpp | Set Divert Valve | Waste     |

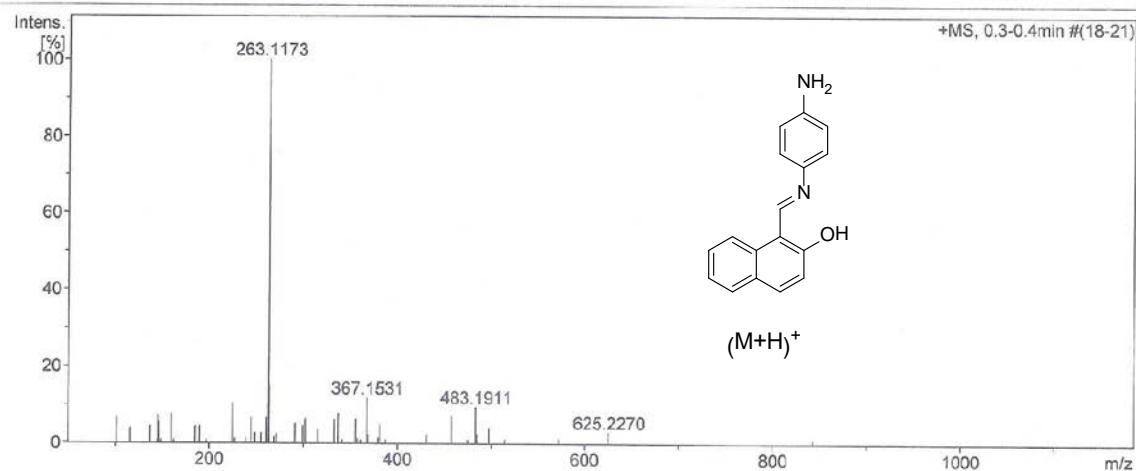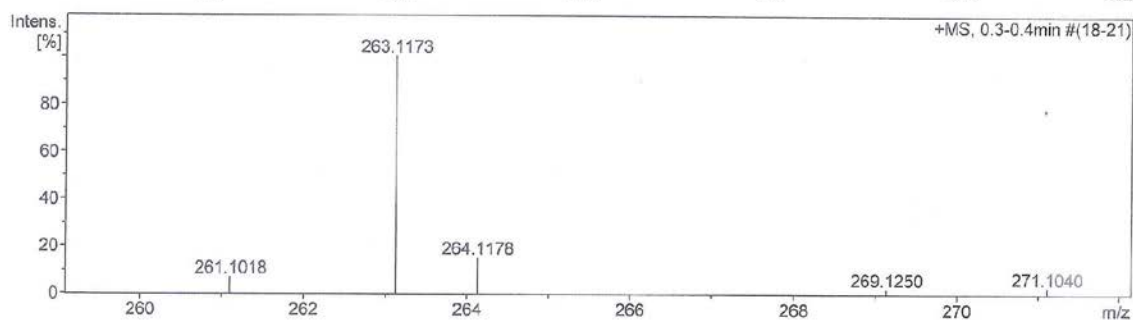

## The blue shifting of the fluorescence emission band

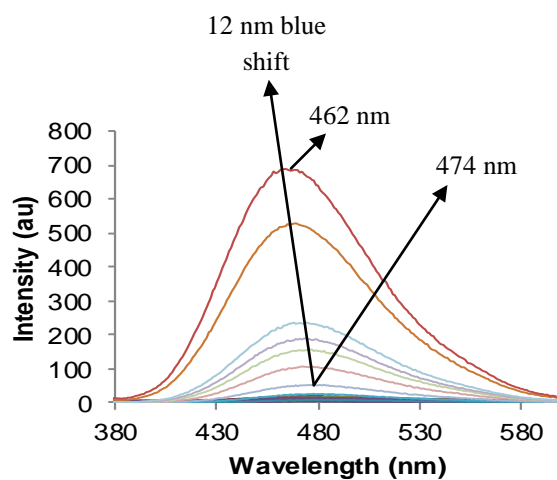

**Figure S11.** Blue shifted fluorescence emission spectrum of receptor **2** after addition of H<sub>2</sub>S.

## Temperature dependent fluorescence studies

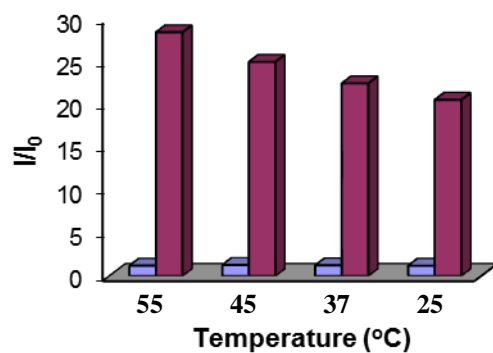

**Figure S12.** Fluorescence response of **2** (5  $\mu\text{M}$ ) in  $\text{H}_2\text{O}:\text{CH}_3\text{CN}$  (99.5:0.5, v/v) buffered with HEPES in different temperature ( $^\circ\text{C}$ ) value ( $\lambda_{\text{ex}} = 320 \text{ nm}$ ) to addition of 30  $\mu\text{M}$   $\text{H}_2\text{S}$  at  $\text{pH} = 7.4$ . Red bars indicate the presence of  $\text{H}_2\text{S}$  and blue bars represent only free ligand **2**. Data were given after incubation with  $\text{H}_2\text{S}$  after 15 minutes.

## Competitive fluorescence selectivity of compound 2

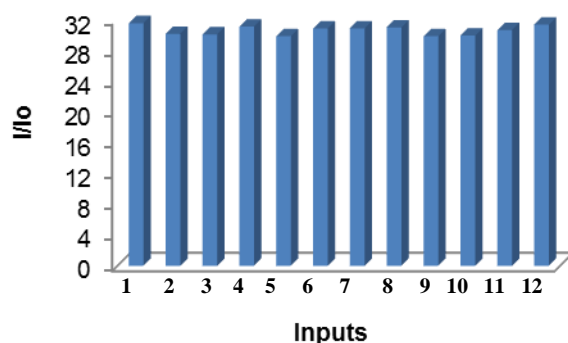

**Figure S13.** Competitive fluorescence selectivity of **2** (5  $\mu\text{M}$ ) towards  $\text{H}_2\text{S}$  (30  $\mu\text{M}$ ) in  $\text{H}_2\text{O}:\text{CH}_3\text{CN}$  (99.5:0.5, v/v) buffered with HEPES, pH = 7.4;  $\lambda_{\text{ex}}$  = 320 nm in the presence of other analyte (30  $\mu\text{M}$  each). Bars represent the emission intensity ratio ( $I/I_0$ ) ( $I_0$  = initial fluorescence intensity at 462 nm;  $I$  = final fluorescence intensity at 462 nm after the addition of other analyte. 1,  $\text{H}_2\text{S}$ ; 2, Cys; 3,  $\text{H}_2\text{O}_2$ ; 4,  $\text{ClO}^-$ ; 5, TBHP; 6,  $\text{F}^-$ ; 7,  $\text{Br}^-$ ; 8,  $\text{I}^-$ ; 9,  $\text{N}_3^-$ ; 10,  $\text{CN}^-$ ; 11,  $\text{AcO}^-$  and 12,  $\text{S}_2\text{O}_3^{2-}$ ; Data were given after the incubation period of 20 minutes with appropriate analytes. Note: We are used main interfering analyte for competitive study.

## Detection limit compound **2** towards H<sub>2</sub>S

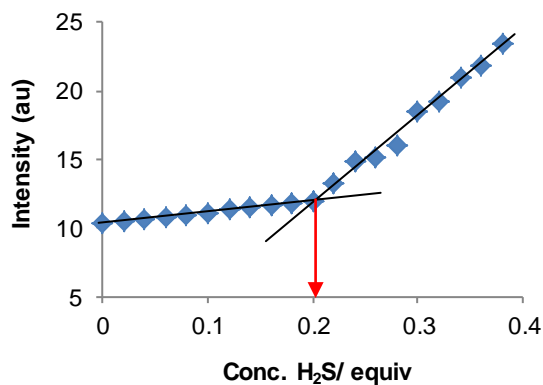

**Figure S14.** Figure showing the fluorescence intensity at 462 nm as a function of H<sub>2</sub>S concentration. To determine the detection limit, fluorescence titration of compound **2** (5  $\mu$ M) with H<sub>2</sub>S was carried and the fluorescence intensity as a function of H<sub>2</sub>S added was then plotted. From this graph the equivalents used at which there was a sharp change in the fluorescence intensity multiplied with the concentration of receptor **2** gave the detection limit.

$$\begin{aligned}\text{DL (detection limit)} &= 5 \times 10^{-6} \times 0.2 = 10 \times 10^{-7} \\ &= 10 \times 10^{-7} \text{ M}\end{aligned}$$

### **Preparation of test-strips:**

We used pre-coated thin layer chromatography plate as a test-strip. At first we dipped the test-strip into the solution of compound 2 ( $10^{-3}$  M) in acetonitrile and then we took the photograph of the TLC strips under UV-lamp. The saturated solution of  $\text{H}_2\text{S}$  ( $10^{-4}$  M in distilled water) poured on the test-strip. After 20 minutes the photograph of the test-strip was taken under UV-lamp.
